# Supplementary material
Source: PubMed Central journal article supplement (PMC4411946)

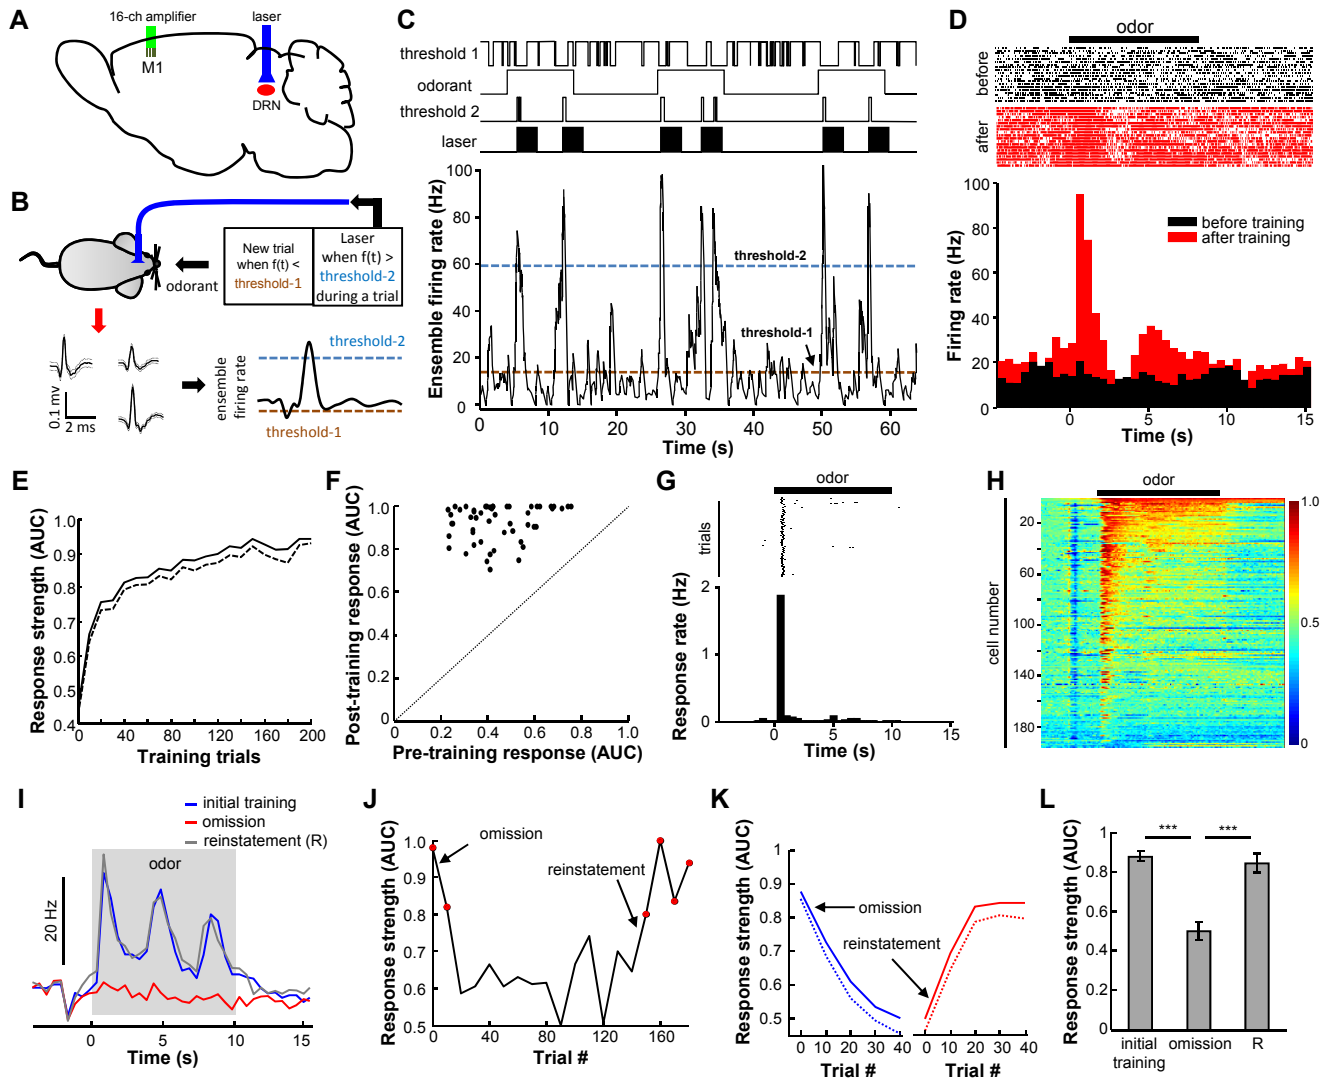

Supplement: NIHMS677826-supplement-10.pdf [file NIHMS677826-supplement-10.pdf]

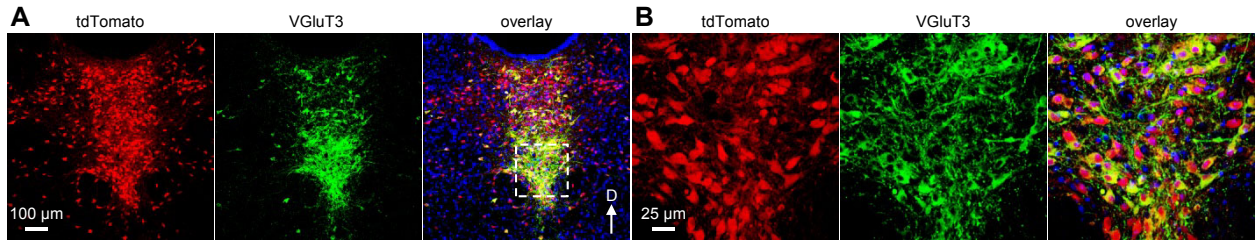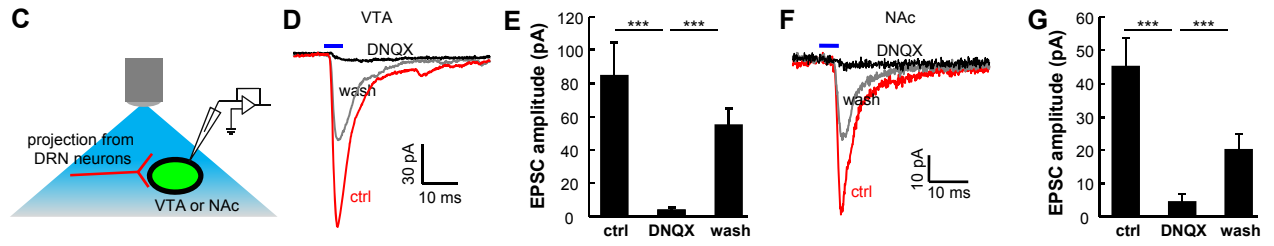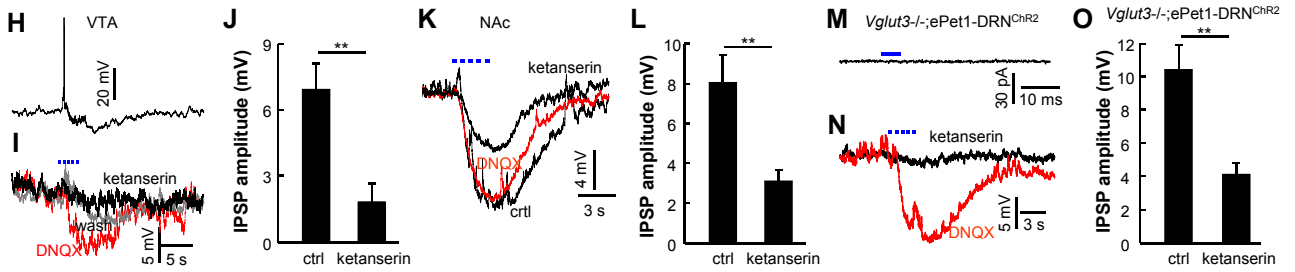

Supplement: NIHMS677826-supplement-11.pdf [file NIHMS677826-supplement-11.pdf]

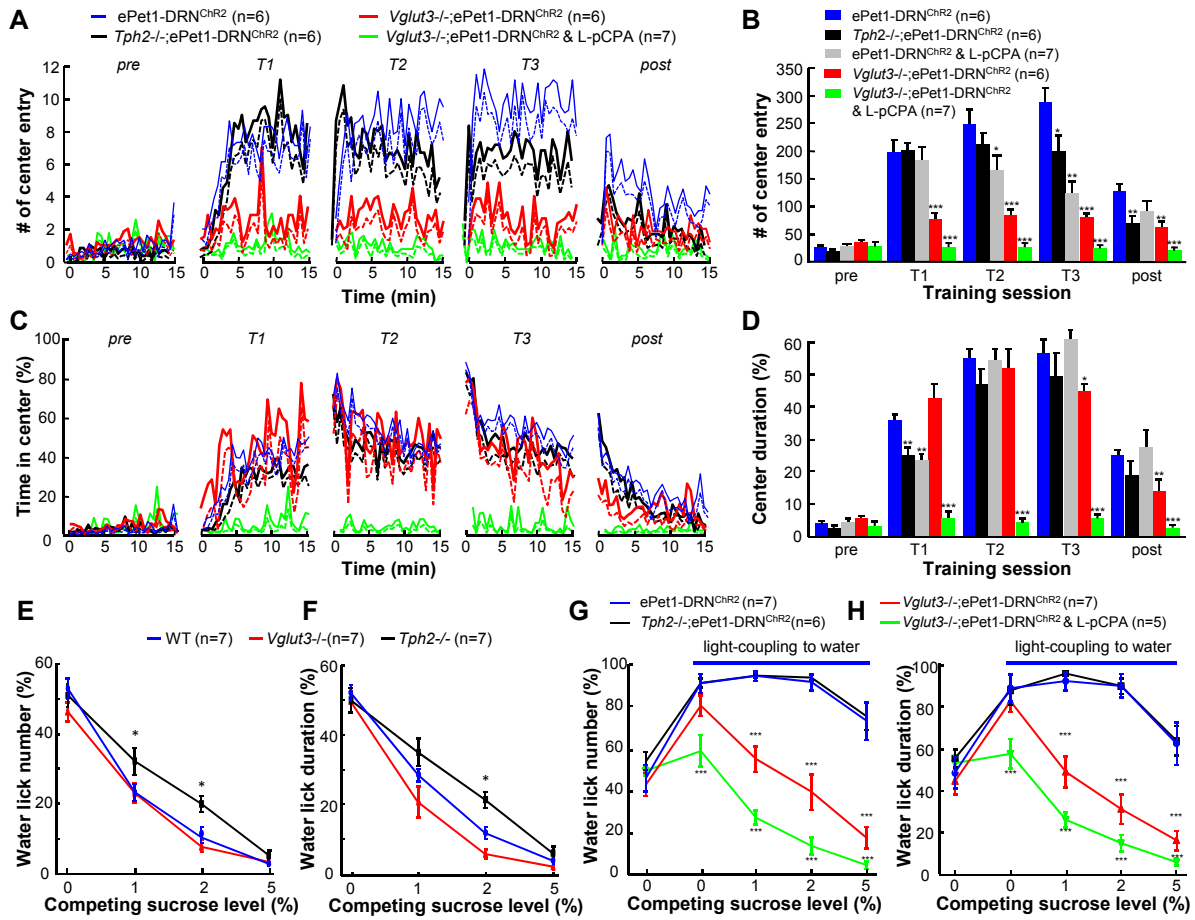

Supplement: NIHMS677826-supplement-12.pdf [file NIHMS677826-supplement-12.pdf]

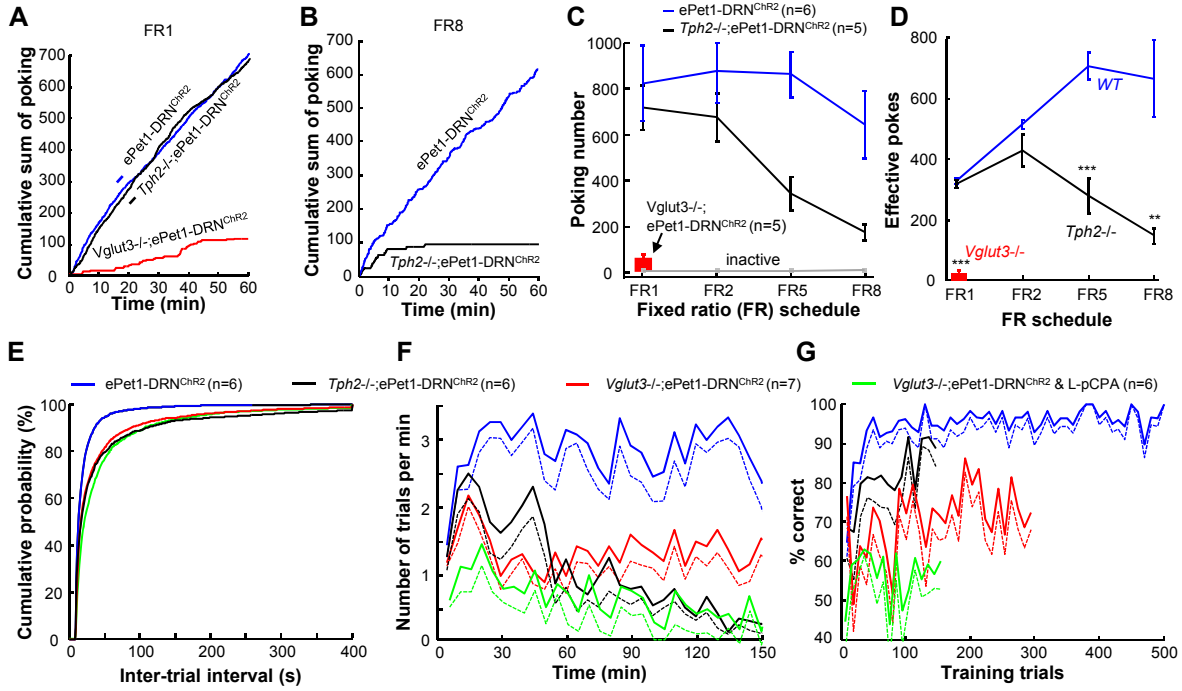

Supplement: NIHMS677826-supplement-13.pdf [file NIHMS677826-supplement-13.pdf]

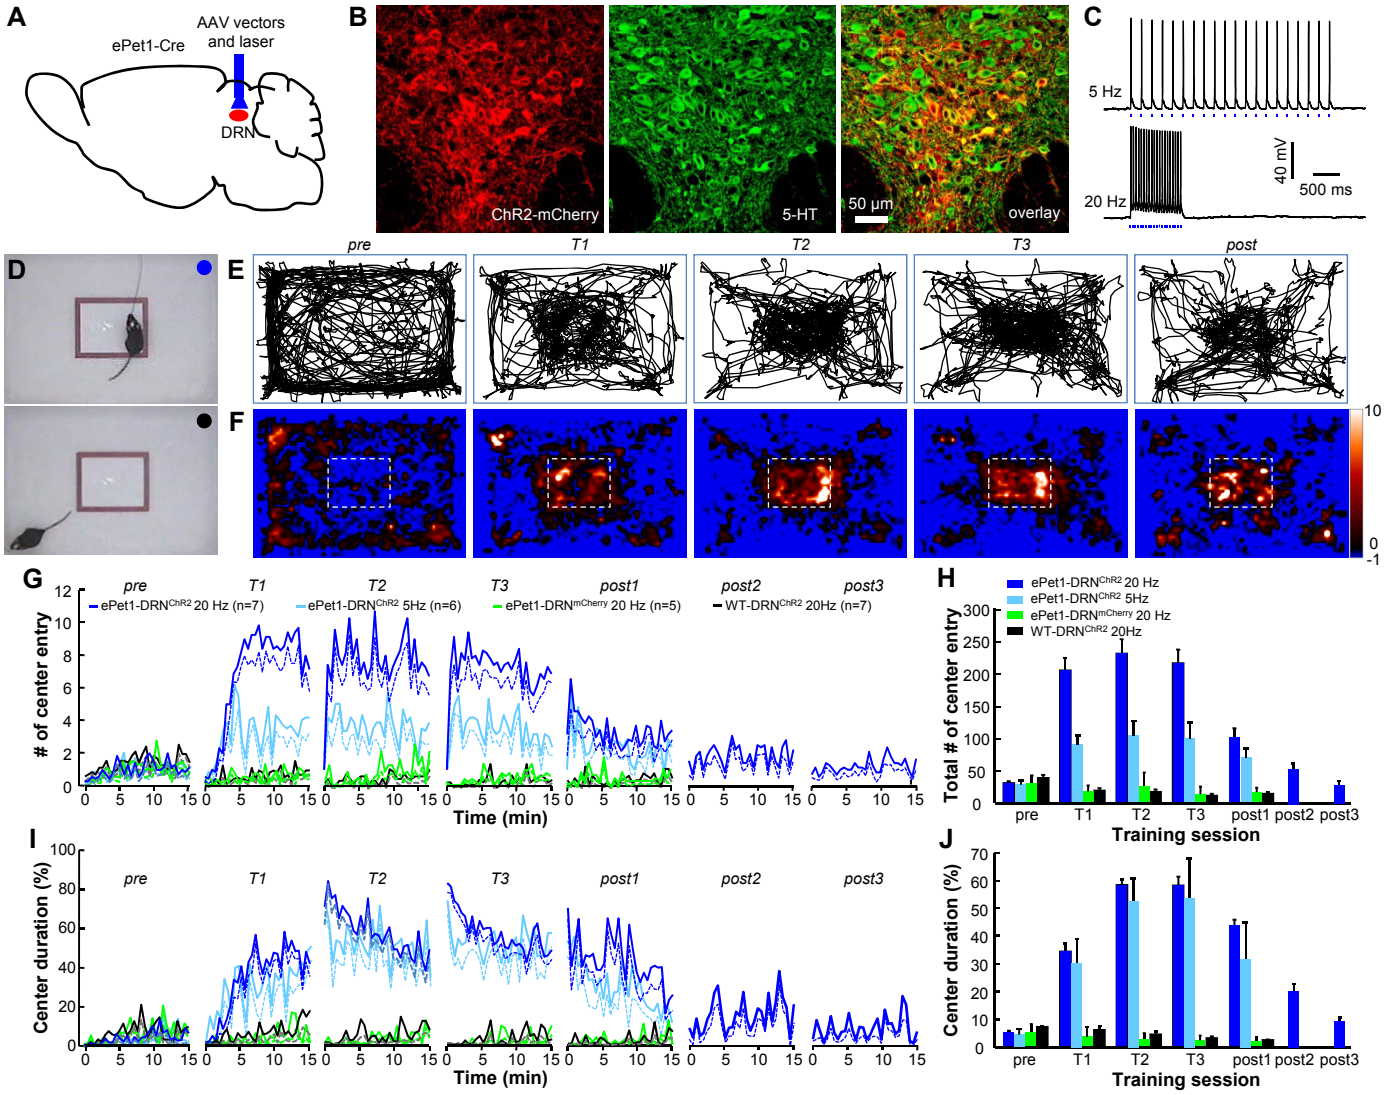

Supplement: NIHMS677826-supplement-6.pdf [file NIHMS677826-supplement-6.pdf]

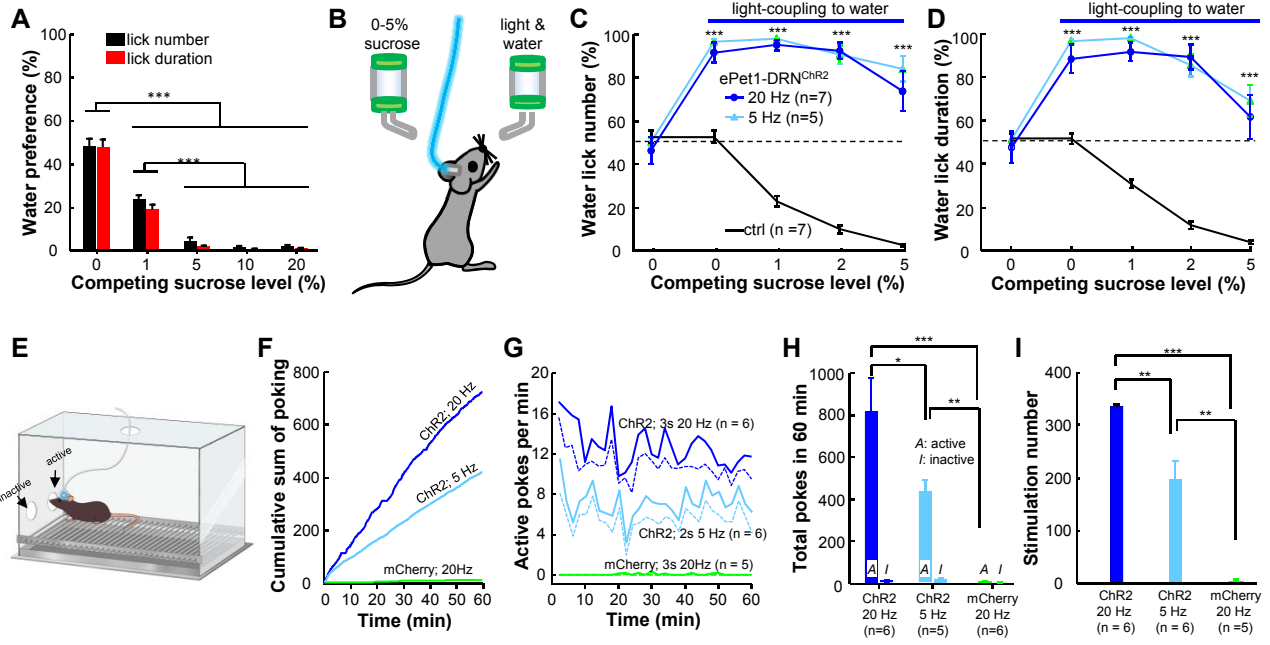

Supplement: NIHMS677826-supplement-7.pdf [file NIHMS677826-supplement-7.pdf]

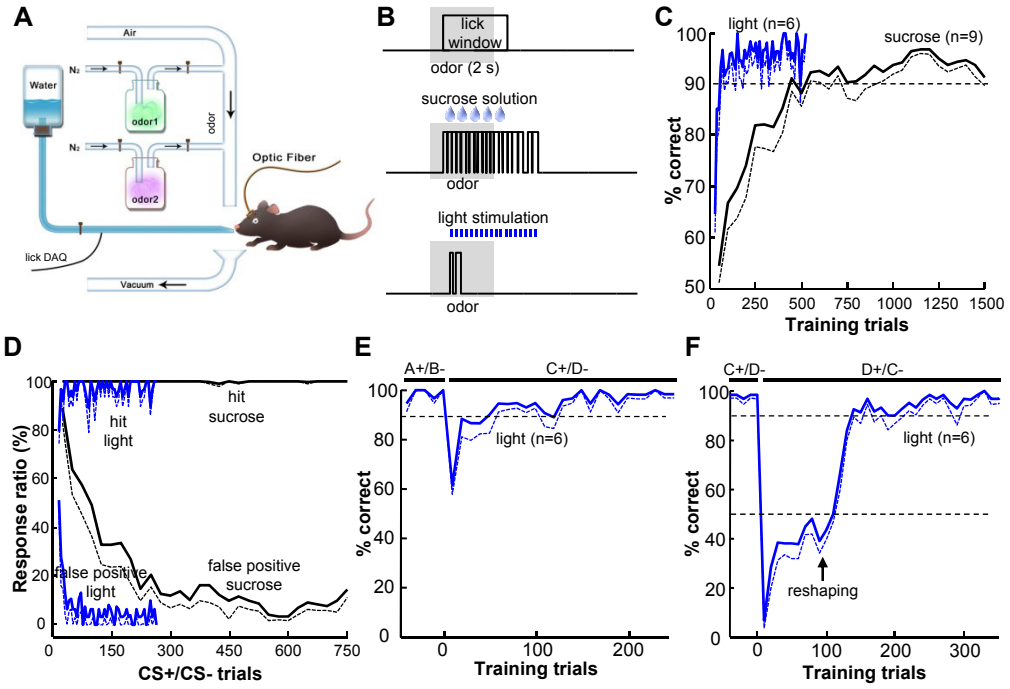

Supplement: NIHMS677826-supplement-8.pdf [file NIHMS677826-supplement-8.pdf]

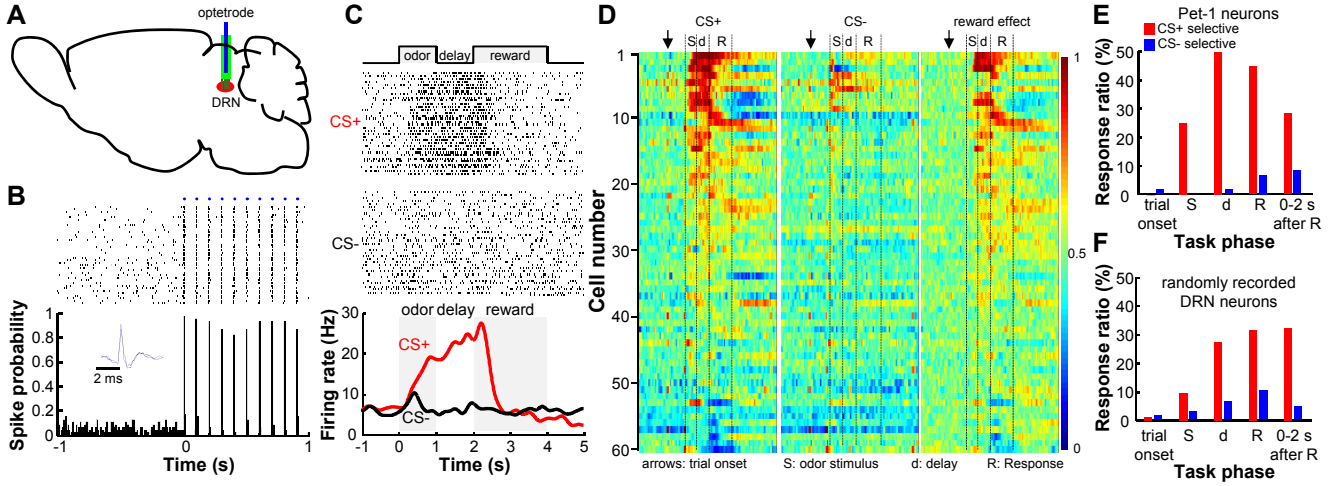

Supplement: NIHMS677826-supplement-9.pdf [file NIHMS677826-supplement-9.pdf]
